# Supplementary material for: Elimination of interlayer Schottky barrier in borophene/C4N4 vdW heterojunctions via Li-ion adsorption for tunneling photodiodes
Source: Royal Society of Chemistry journal article supplement (doi:10.1039/d0tc05943a), 2021-01-01
Supplement: d0tc05943a1.pdf [file d0tc05943a1.pdf]

## Supplementary data for

# Elimination of interlayer Schottky barrier in borophene/C<sub>4</sub>N<sub>4</sub> vdW heterojunction *via* Li-ions adsorption for tunneling photodiode

Cancan Zheng,<sup>a</sup> Cong Zhou,<sup>a</sup> Man Shi,<sup>a</sup> Haiyan Li,<sup>a</sup> Nianxi Dou,<sup>a</sup> Zhihao Ma,<sup>a</sup>  
Feifei Xia,<sup>b</sup> Yuanyuan He,<sup>\*a</sup>, Jianwei Zhao<sup>\*a</sup>

<sup>a</sup> College of Material and Textile Engineering, Key Laboratory of Yarn Materials Forming and Composite Processing Technology, Jiaxing University, Jiaxing 314001, Zhejiang, P. R. China

<sup>b</sup> School of Chemical and Environmental Engineering, Jiangsu University of Technology, Changzhou 213001, Jiangsu, P. R. China

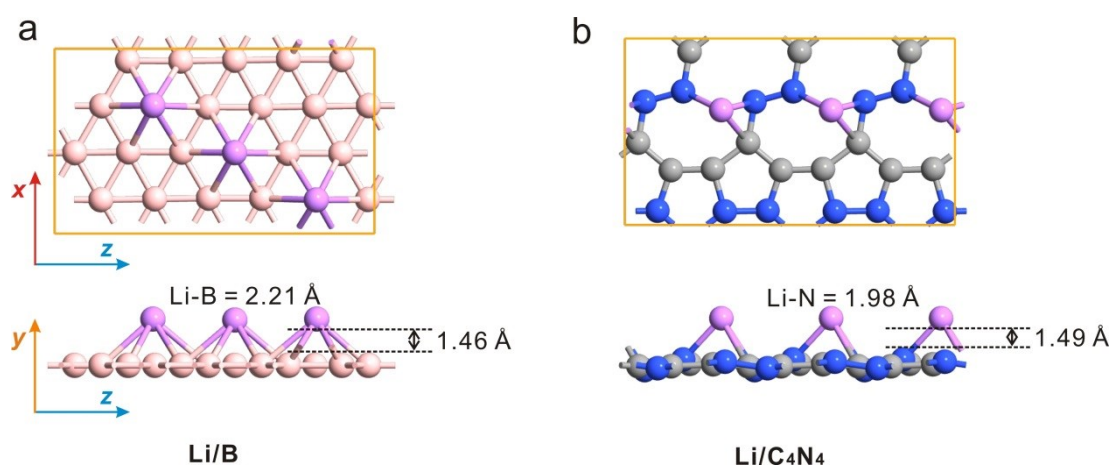

**Fig. S1** Top and side views of (a) Li-ions-adsorbed borophene (Li/B) and (b) Li-ions-adsorbed C<sub>4</sub>N<sub>4</sub> (Li/C<sub>4</sub>N<sub>4</sub>) monolayers, respectively.

\* Corresponding author: [hey@zjxu.edu.cn](mailto:hey@zjxu.edu.cn) (Y.Y. He); [jwzhao@zjxu.edu.cn](mailto:jwzhao@zjxu.edu.cn) (J.W. Zhao).

**Table S1** The lattice constants along  $x$  ( $a$ ) and  $z$  ( $c$ ) directions, binding energy ( $E_b$ ), the interlayer distance ( $d_y$ ) in Li/B and Li/C<sub>4</sub>N<sub>4</sub> monolayers, respectively.

|                                  | $a/\text{\AA}$ | $c/\text{\AA}$ | $E_b/\text{eV/atom}$ | $d_y/\text{\AA}$ | $L_{\text{Li-X}}/\text{\AA}$ | $\Delta\Phi/\text{eV}$ |
|----------------------------------|----------------|----------------|----------------------|------------------|------------------------------|------------------------|
| Li/B                             | 5.86           | 10.13          | -0.46                | 1.46             | 2.21 (Li-B)                  | -3.44                  |
| Li/C <sub>4</sub> N <sub>4</sub> | 6.08           | 10.77          | -0.23                | 1.49             | 1.98 (Li-N)                  | -4.55                  |

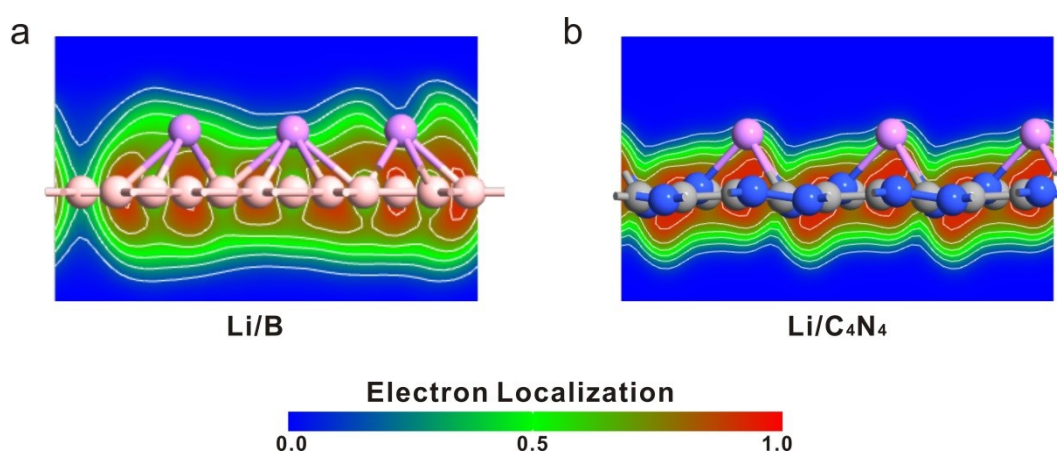

**Fig. S2** Side views of ELF maps for (a) Li/B and (b) Li/C<sub>4</sub>N<sub>4</sub> monolayers, respectively.
